# Supplementary material for: Efficient bioconversion of furfural to furfuryl alcohol byBacillus coagulansNL01
Source: Royal Society of Chemistry journal article supplement (doi:10.1039/c8ra05098h), 2018-01-01
Supplement: c8ra05098h1.pdf [file c8ra05098h1.pdf]

Efficient biocoverison of Furfural to Furfuryl Alcohol by *Bacillus coagulans* NL01

Yu-Xiu Yan,<sup>a,b</sup> Chong-Yang Bu,<sup>c</sup> Qin He,<sup>c</sup> Zhao-Juan Zheng,<sup>a</sup> and Jia Ouyang<sup>\*a,c</sup>

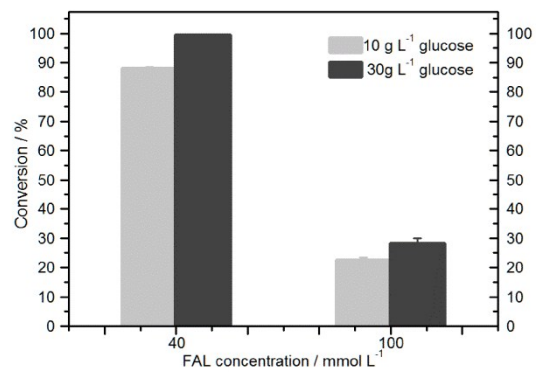

**Figure.S1.** Whole cell-catalyzed reduction of FAL in the presence of 10 g L<sup>-1</sup> and 30 g L<sup>-1</sup> glucose.

Conditions: 40,100 mM FAL, 9 mg (dry weight) / ml microbial cells, 25 ml phosphate buffer (200 mM pH 7.0), 150 rpm, 50 °C.
